# Supplementary material for: Two MOFs as dual-responsive photoluminescence sensors for metal and inorganic ion detection
Source: Royal Society of Chemistry journal article supplement (doi:10.1039/c8dt01363b), 2018-01-01
Supplement: c8dt01363b1.pdf [file c8dt01363b1.pdf]

Electronic Supplementary Material (ESI) for Dalton Transactions.

This journal is © The Royal Society of Chemistry 2018

**Electronic Supplementary Information for  
Two MOFs as dual-responsive photoluminescence sensors for metal  
and inorganic ions detection**

Zhong-Jie Wang, Fa-Yuan Ge, Guo-Hao Sun and He-Gen Zheng\*

*State Key Laboratory of Coordination Chemistry, School of Chemistry and Chemical Engineering, Collaborative Innovation Center of Advanced Microstructures, Nanjing University, Nanjing 210023, P. R. China*

## Crystal structure determination

The crystal structures were determined by single-crystal X-ray analyses. Data collections were performed using a Bruker Apex Smart CCD diffractometer with Mo-K $\alpha$  radiation with an  $\varphi$ - $\omega$  mode ( $\lambda = 0.71073$  Å). The structures were solved with direct methods using the SHELXTL program<sup>1-2</sup> and refined anisotropically with SHELXTL using full-matrix least-squares procedures. Crystallographic data and structural refinements parameters for these compounds are given in Table S1. Selected bond lengths and angles are listed in Table S2. Hydrogen-Bonding geometry is listed in Table S3.

**Table S1.** Crystal data and structural refinements parameters of **1** and **2**.

| Compound                                      | <b>1</b>                                                                        | <b>2</b>                                                                        |
|-----------------------------------------------|---------------------------------------------------------------------------------|---------------------------------------------------------------------------------|
| Empirical formula                             | C <sub>26</sub> F <sub>4</sub> H <sub>15</sub> N <sub>5</sub> O <sub>4</sub> Zn | C <sub>29</sub> F <sub>4</sub> H <sub>24</sub> N <sub>6</sub> O <sub>6</sub> Cd |
| Formula weight                                | 602.80                                                                          | 740.94                                                                          |
| Crystal system                                | Triclinic                                                                       | Monoclinic                                                                      |
| Space group                                   | $P\bar{1}$                                                                      | $C2/c$                                                                          |
| $a$ / Å                                       | 10.8391(8)                                                                      | 17.7736(18)                                                                     |
| $b$ / Å                                       | 11.1144(9)                                                                      | 17.8696(18)                                                                     |
| $c$ / Å                                       | 11.6293(9)                                                                      | 18.3763(19)                                                                     |
| $\alpha$ / °                                  | 116.6100(10)                                                                    | 90.00                                                                           |
| $\beta$ / °                                   | 91.5160(10)                                                                     | 98.7620(10)                                                                     |
| $\gamma$ / °                                  | 103.2240(10)                                                                    | 90.00                                                                           |
| $V$ / Å <sup>3</sup>                          | 1205.92(16)                                                                     | 5768.3(10)                                                                      |
| $Z$                                           | 2                                                                               | 8                                                                               |
| $D_{\text{calcd}}$ / g cm <sup>-3</sup>       | 1.660                                                                           | 1.706                                                                           |
| $\mu$ / mm <sup>-1</sup>                      | 1.095                                                                           | 0.839                                                                           |
| $F(000)$                                      | 608                                                                             | 2976                                                                            |
| $\theta$ min-max / °                          | 1.952, 27.559                                                                   | 1.626, 28.247                                                                   |
| Tot., uniq. data                              | 11076, 5576                                                                     | 26942, 7143                                                                     |
| $R(\text{int})$                               | 0.0254                                                                          | 0.0397                                                                          |
| Observed data [ $I > 2\sigma(I)$ ]            | 5576                                                                            | 7143                                                                            |
| Nres, Npar                                    | 0, 365                                                                          | 7, 427                                                                          |
| $R_1, wR_2$ [ $I > 2\sigma(I)$ ] <sup>a</sup> | 0.0341, 0.0794                                                                  | 0.0383, 0.0858                                                                  |
| GOF on $F^2$                                  | 1.039                                                                           | 1.079                                                                           |
| Min. and max resd dens (e · Å <sup>-3</sup> ) | -0.359, 0.378                                                                   | -0.756, 0.962                                                                   |

<sup>a</sup> $R_1 = \frac{\sum ||F_o| - |F_c||}{\sum |F_o|}$ .  $wR_2 = \left\{ \frac{\sum [w(F_o^2 - F_c^2)^2]}{\sum [w(F_o^2)^2]} \right\}^{1/2}$ , where  $w = 1/[\sigma^2(F_o^2) + (aP)^2 + bP]$ ,  $P = (F_o^2 + 2F_c^2)/3$ .

**Table S2.** Selected bond lengths (Å) and angles (deg) for **1** and **2**.

| <b>1</b>                      |            |                               |            |
|-------------------------------|------------|-------------------------------|------------|
| N(1)-Zn(1)                    | 1.9889(17) | N(5)-Zn(1) <sup>a</sup>       | 2.0030(17) |
| O(1)-Zn(1)                    | 1.9509(14) | O(3)-Zn(1)                    | 1.9568(15) |
| O(1)-Zn(1)-O(3)               | 97.46(6)   | O(1)-Zn(1)-N(1)               | 112.46(6)  |
| O(3)-Zn(1)-N(1)               | 118.71(7)  | O(1)-Zn(1)-N(5) <sup>a</sup>  | 111.14(6)  |
| O(3)-Zn(1)-N(5) <sup>a</sup>  | 104.75(7)  | N(1)-Zn(1)-N(5) <sup>a</sup>  | 111.39(7)  |
| <b>2</b>                      |            |                               |            |
| Cd(1)-N(4)                    | 2.270(3)   | Cd(1)-N(1)                    | 2.272(3)   |
| Cd(1)-O(3)                    | 2.319(2)   | Cd(1)-O(1W)                   | 2.330(2)   |
| Cd(1)-O(2) <sup>b</sup>       | 2.406(2)   | Cd(1)-O(2)                    | 2.422(2)   |
| O(2)-Cd(1) <sup>b</sup>       | 2.405(2)   | N(4)-Cd(1)-N(1)               | 176.58(9)  |
| N(4)-Cd(1)-O(3)               | 92.52(9)   | N(1)-Cd(1)-O(3)               | 90.53(9)   |
| N(4)-Cd(1)-O(1W)              | 86.22(9)   | N(1)-Cd(1)-O(1W)              | 92.44(9)   |
| N(1)-Cd(1)-O(1W)              | 92.44(9)   | O(3)-Cd(1)-O(1W)              | 86.12(8)   |
| N(4)-Cd(1)-O(2) <sup>b</sup>  | 89.98(8)   | N(1)-Cd(1)-O(2) <sup>b</sup>  | 92.03(8)   |
| O(3)-Cd(1)-O(2) <sup>b</sup>  | 81.03(7)   | O(1W)-Cd(1)-O(2) <sup>b</sup> | 166.42(7)  |
| N(4)-Cd(1)-O(2)               | 86.75(8)   | N(1)-Cd(1)-O(2)               | 91.28(8)   |
| O(3)-Cd(1)-O(2)               | 152.11(7)  | O(1W)-Cd(1)-O(2)              | 121.59(7)  |
| O(2) <sup>b</sup> -Cd(1)-O(2) | 71.10(7)   |                               |            |

Symmetry codes:  
for **1** : a = x + 2, -y, -z + 1.  
for **2** : b = -x + 1, y, -z + 1/2.

**Table S3.** Hydrogen-Bonding Geometry (Å, °) for **1** and **2**.

| D-H...A                   | d(D...A)  | ∠D-H...A |
|---------------------------|-----------|----------|
| <b>1</b>                  |           |          |
| N3-H3A...O4 <sup>a</sup>  | 2.880(2)  | 158(2)   |
| <b>2</b>                  |           |          |
| N3-H3A...O1W <sup>a</sup> | 2.936(3)  | 141.2    |
| O1W-H1WA...O5             | 2.781(4)  | 178.1    |
| O1W-H1WB...O3             | 3.174(3)  | 125.6    |
| O1W-H1WB...O4             | 2.569 (5) | 139.6    |
| O1W-H1WB...O4'            | 2.744(7)  | 178.0    |

Symmetry codes:  
for **1**: a = x, y - 1, z - 1.  
for **2**: a = x, -y + 2, z + 2/1.

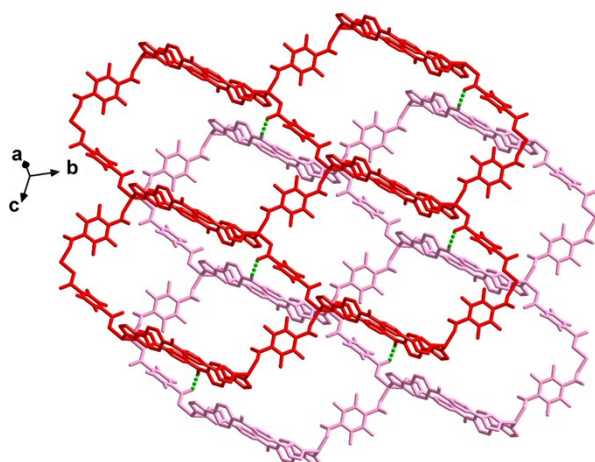

**Fig. S1** Schematic representation of H-bonding interactions in **1**. The H-bonding interactions are shown with green dash lines.

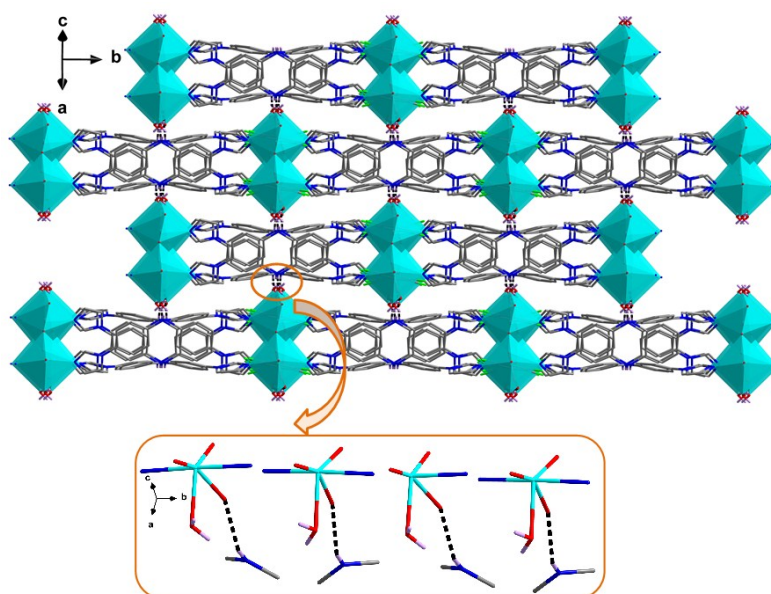

**Fig. S2** Schematic representation of H-bonding interactions in **2**. The H-bonding interactions are shown with black dash lines.

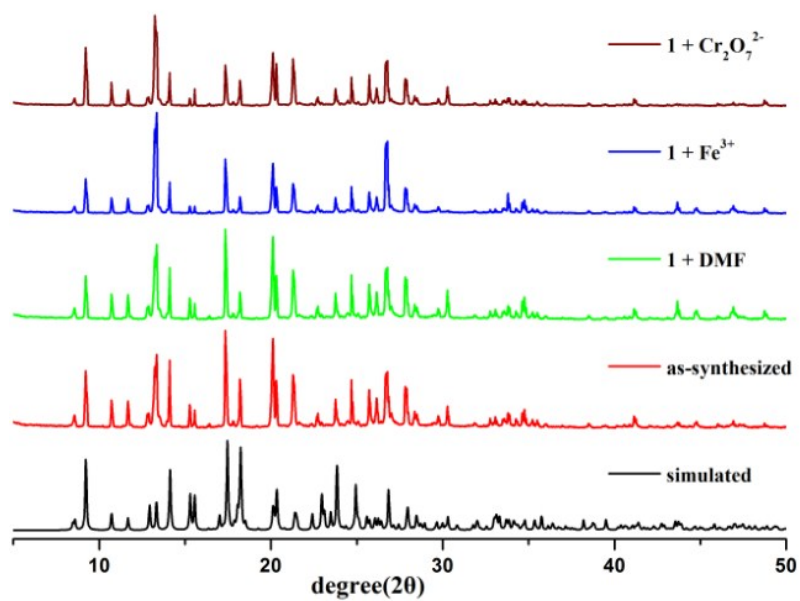

**Fig. S3** Powder X-ray diffraction patterns of **1**.

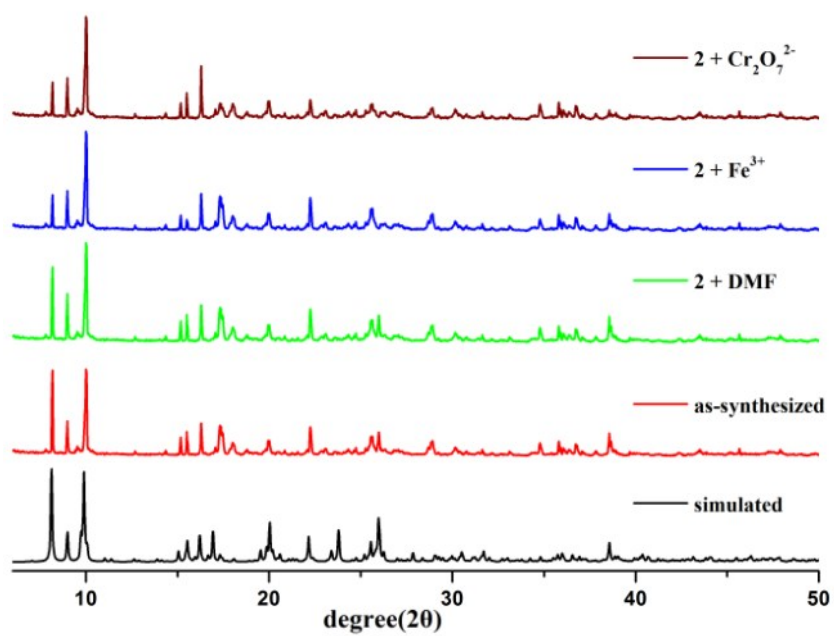

**Fig. S4** Powder X-ray diffraction patterns of **2**.

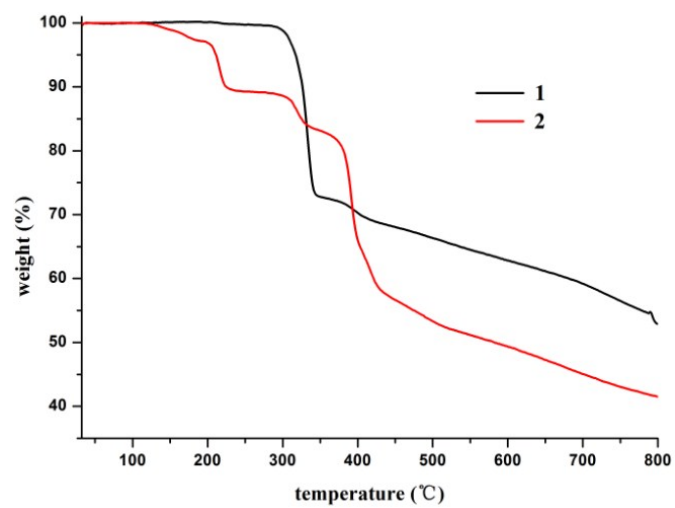

Fig. S5 TGA plots of 1 and 2.

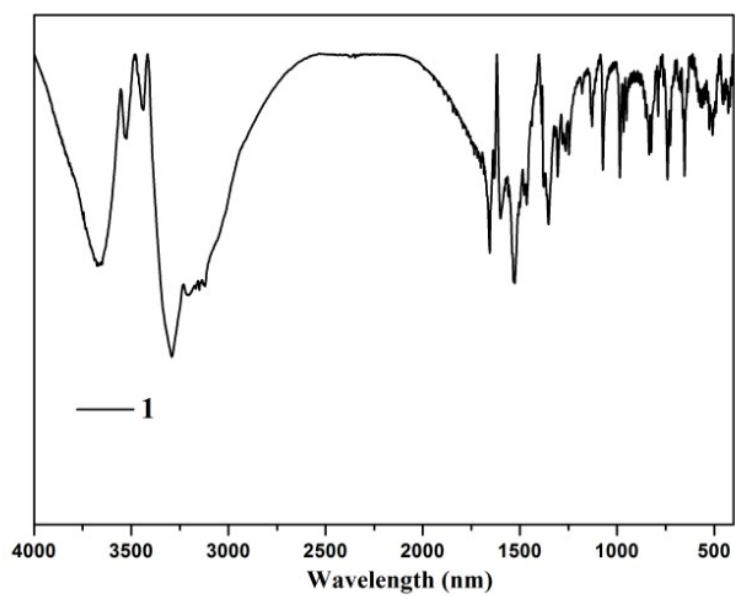

Fig. S6 IR spectra of 1.

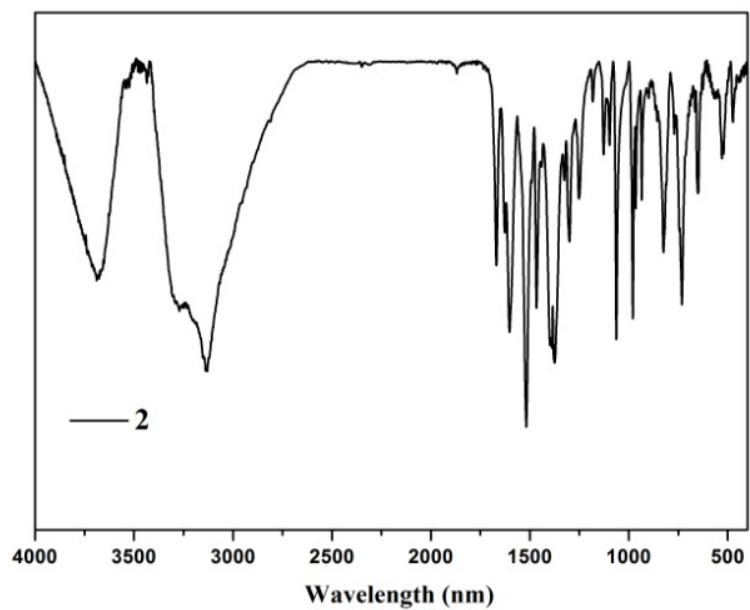

Fig. S7 IR spectra of 2.

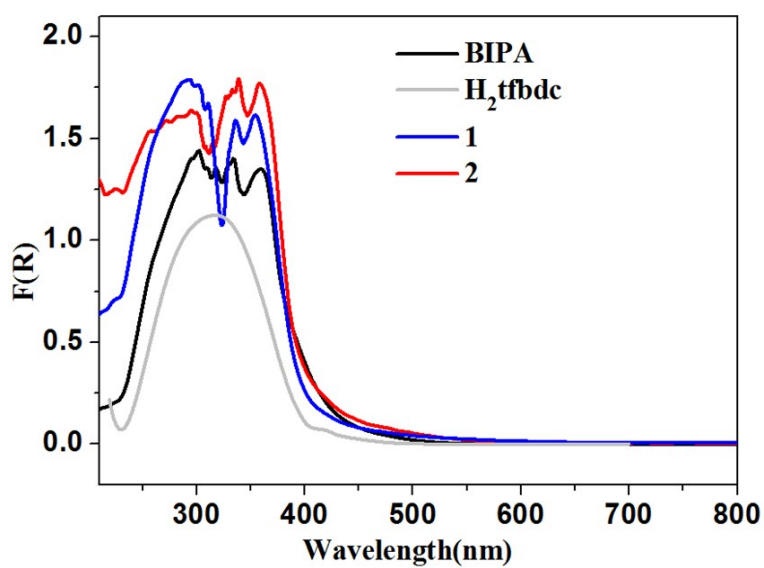

Fig. S8 Solid-state UV-vis absorption spectra of BIPA ligand, H<sub>2</sub>tfbdc ligand, 1 and 2.

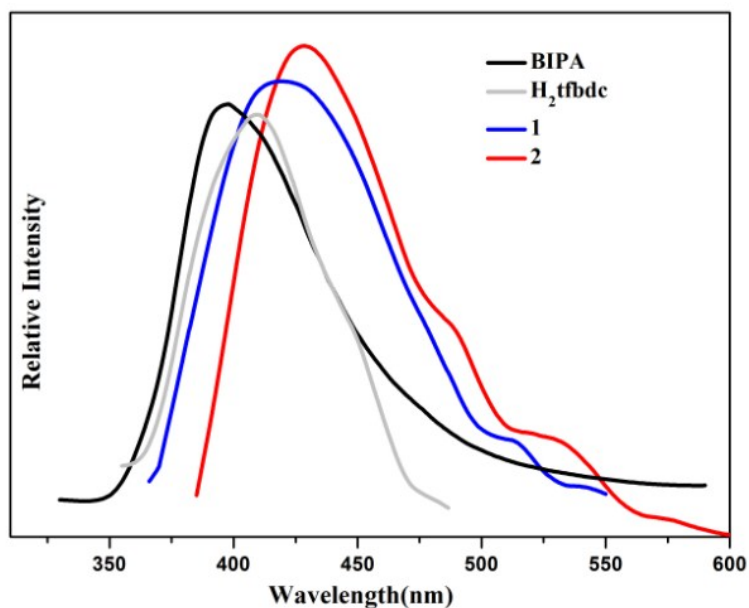

**Fig. S9** Solid-state photoluminescent spectra of BIPA ligand, H<sub>2</sub>tfbdc ligand, **1** and **2** ( $\lambda_{\text{ex}}$  300 nm).

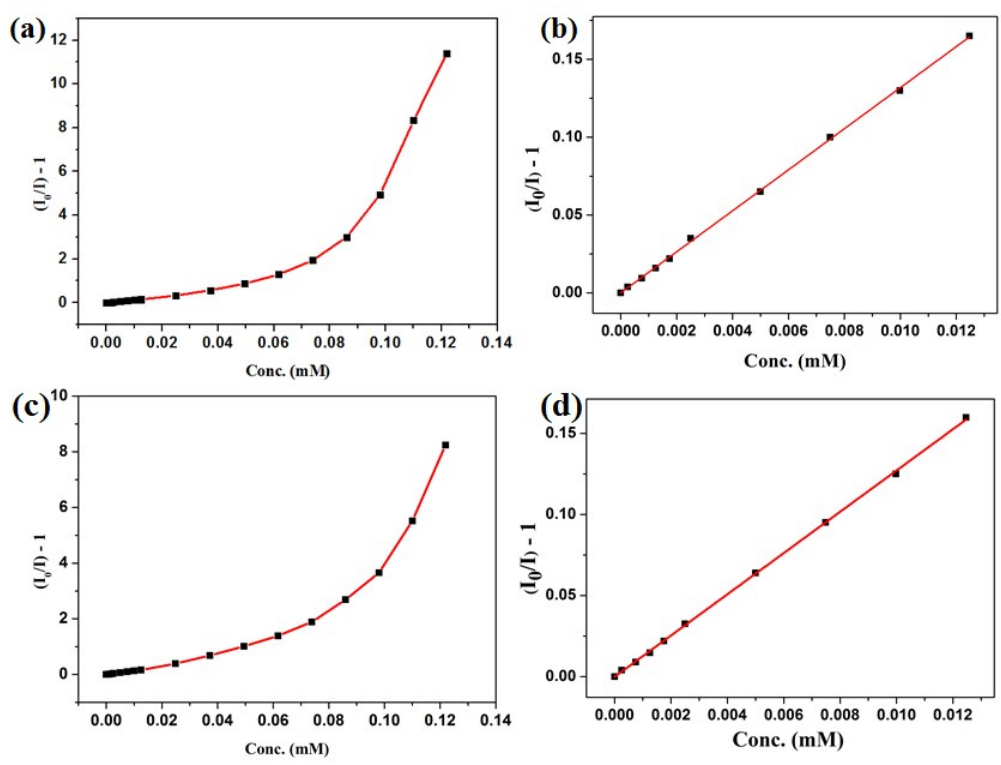

**Fig. S10** (a) SV curve for **1** by gradual addition of Fe<sup>3+</sup> ion (50  $\mu$ L,  $5 \times 10^{-3}$  M) in DMF. (b) Emission quenching linearity relationship at low concentrations of Fe<sup>3+</sup> ion for **1**. (c) SV curve for **2** by gradual addition of Hg<sup>2+</sup> ion (50  $\mu$ L,  $5 \times 10^{-3}$  M) in DMF. (d) Emission quenching linearity relationship at low concentrations of Hg<sup>2+</sup> ion for **2**.



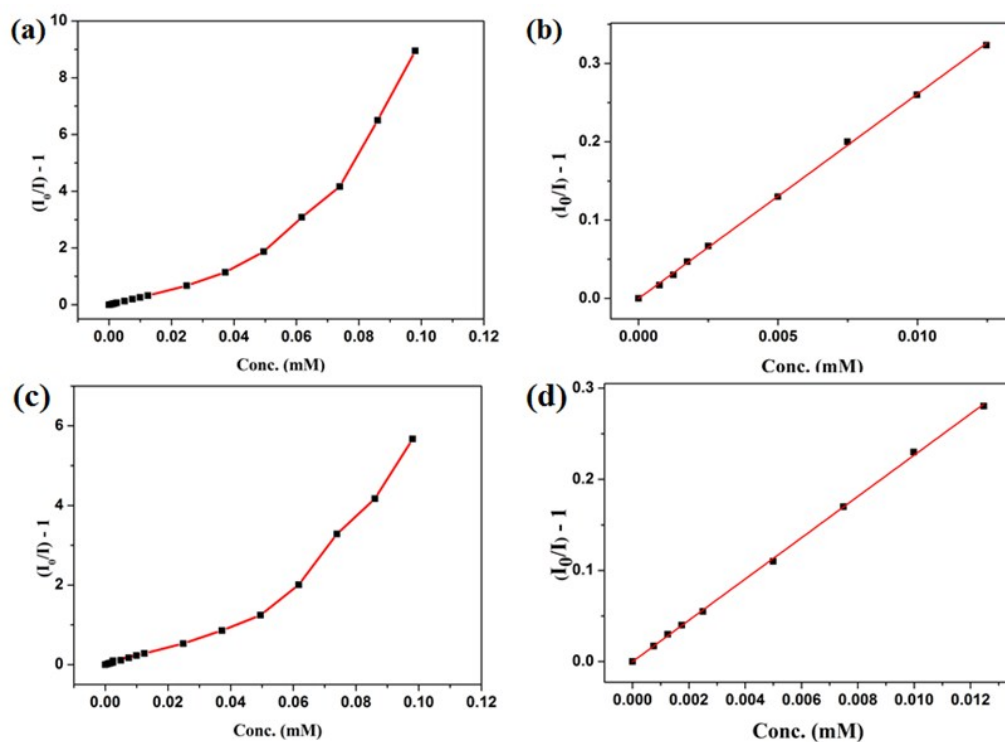

**Fig. S11** SV curves for (a) **1** and (c) **2** by gradual addition of  $\text{Cr}_2\text{O}_7^{2-}$  ion ( $40 \mu\text{L}$ ,  $5 \times 10^{-3} \text{ M}$ ) in DMF. Emission quenching linearity relationship at low concentrations of  $\text{Cr}_2\text{O}_7^{2-}$  ion for (b) **1** and (d) **2**.

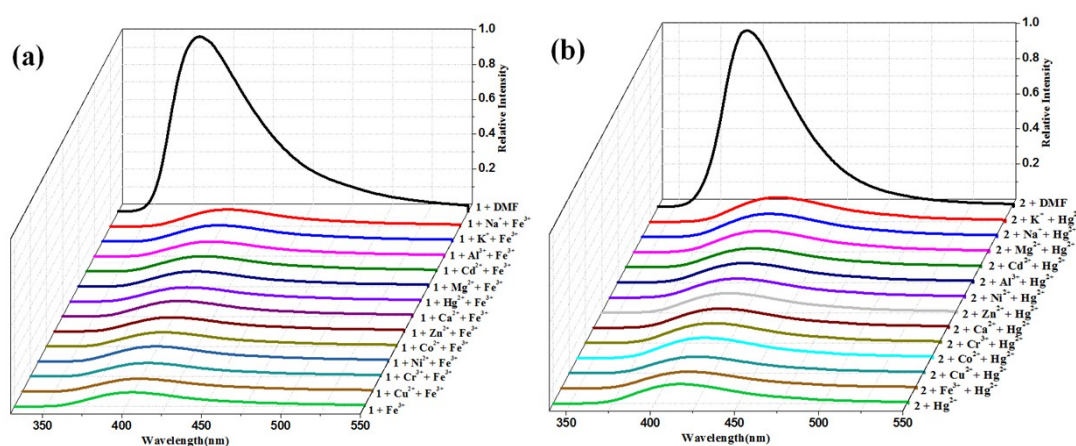

**Fig. S12** The relative emission intensity of (a) **1** and (b) **2** before and after addition  $\text{Fe}^{3+}$  ion ( $50 \mu\text{L}$ ,  $5 \times 10^{-3} \text{ M}$ ) and other metal ions ( $50 \mu\text{L}$ ,  $5 \times 10^{-3} \text{ M}$ ).

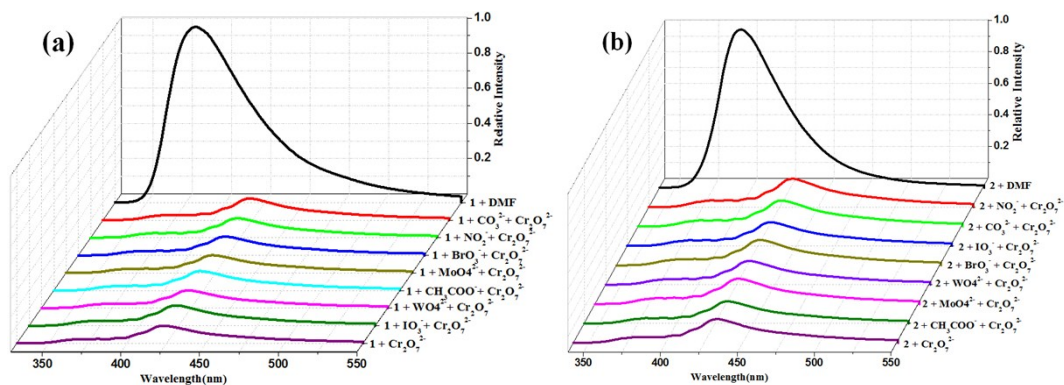

**Fig. S13** The relative emission intensity of (a) **1** and (b) **2** before and after addition  $\text{Cr}_2\text{O}_4^{2-}$  ion ( $40 \mu\text{L}$ ,  $5 \times 10^{-3} \text{ M}$ ) and other anions ( $40 \mu\text{L}$ ,  $5 \times 10^{-3} \text{ M}$ ).

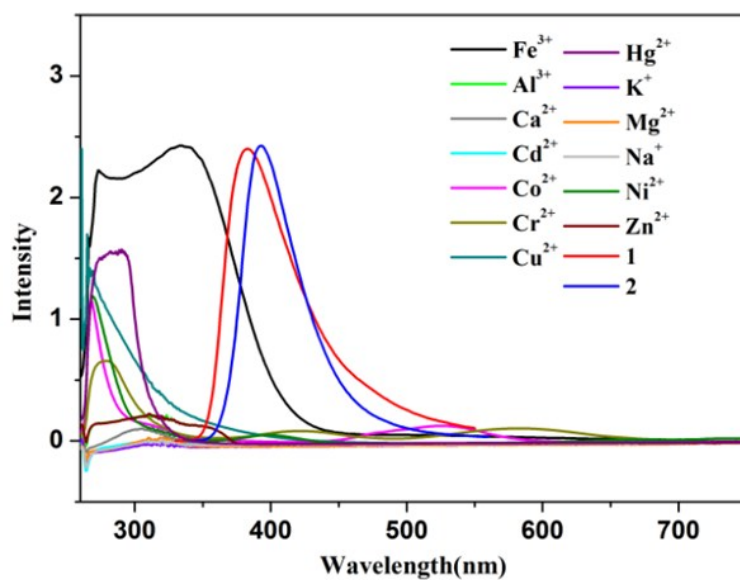

**Fig. S14** Spectral overlap between UV-vis absorbance spectra of metal ions and luminescence emission spectra of MOFs **1** and **2** in DMF.

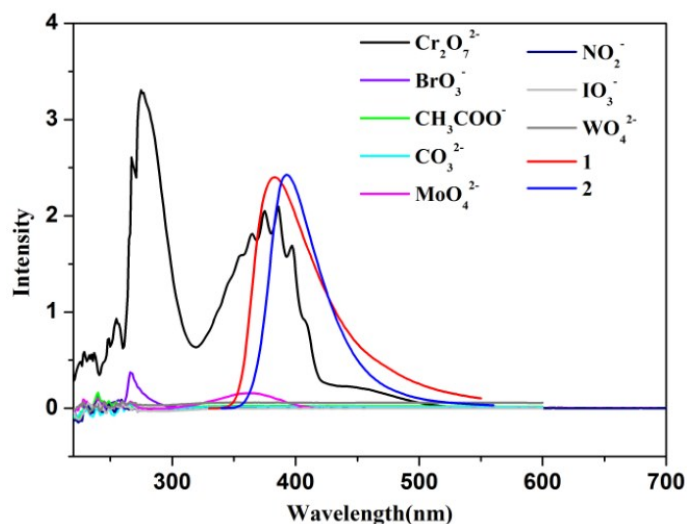

**Fig. S15** Spectral overlap between UV-vis absorbance spectra of inorganic anions and luminescence emission spectra of MOFs **1** and **2** in DMF.

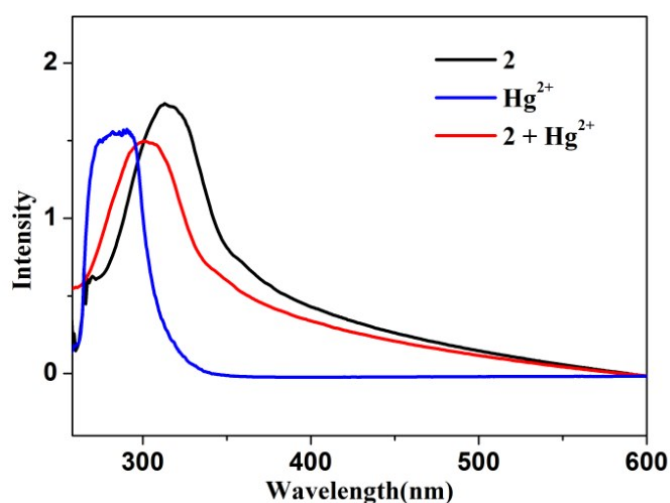

**Fig. S16** UV-vis spectra of **2** before and after addition of  $\text{Hg}^{2+}$  ion.

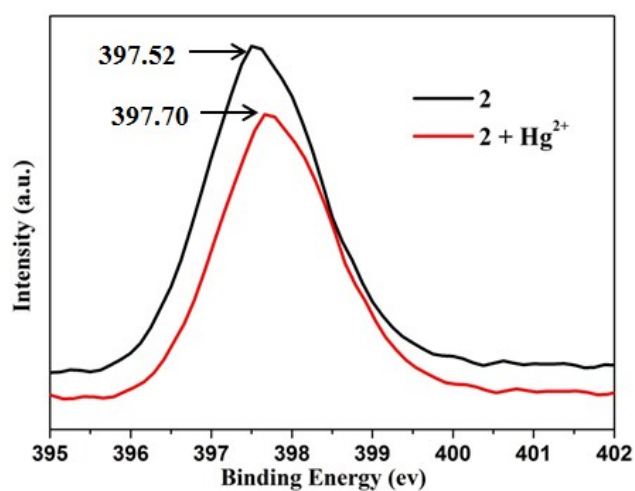

**Fig. S17** N 1s XPS spectra of **2** before and after immersed in  $\text{Hg}^{2+}$  ion.

**Table S4.** The ICP results of MOF **2** before and after treated with Hg<sup>2+</sup> ion for 12 hours.

| MOF <b>2</b>                                                       | concentration / $\mu$ M |
|--------------------------------------------------------------------|-------------------------|
| Initial value / Hg <sup>2+</sup>                                   | 0.75                    |
| After treated with Hg <sup>2+</sup> for 12 hours/ Hg <sup>2+</sup> | 0.36                    |

**Table S5.** The quenching constant or detection limit table of selected MOFs materials for Fe<sup>3+</sup>, Hg<sup>2+</sup> and Cr<sub>2</sub>O<sub>7</sub><sup>2-</sup> ions.

| MOFs                                                                                                                                  | Ions                                         | Detection limit / (M) | Quenching constant / (M <sup>-1</sup> ) | Ref      |
|---------------------------------------------------------------------------------------------------------------------------------------|----------------------------------------------|-----------------------|-----------------------------------------|----------|
| <b>1</b>                                                                                                                              | Fe <sup>3+</sup>                             | $1.1 \times 10^{-7}$  | $1.32 \times 10^4$                      | Our work |
|                                                                                                                                       | Cr <sub>2</sub> O <sub>7</sub> <sup>2-</sup> | $6.9 \times 10^{-8}$  | $1.98 \times 10^4$                      |          |
| <b>2</b>                                                                                                                              | Hg <sup>2+</sup>                             | $1.2 \times 10^{-7}$  | $1.27 \times 10^4$                      |          |
|                                                                                                                                       | Cr <sub>2</sub> O <sub>7</sub> <sup>2-</sup> | $9.1 \times 10^{-8}$  | $1.77 \times 10^4$                      |          |
| {[Eu(L)(BPDC) <sub>1/2</sub> (NO <sub>3</sub> )]·H <sub>3</sub> O} <sub>n</sub>                                                       | Fe <sup>3+</sup>                             |                       | $5.16 \times 10^4$                      | 3        |
| {[Tb(L)(BPDC) <sub>1/2</sub> (NO <sub>3</sub> )]·H <sub>3</sub> O} <sub>n</sub>                                                       |                                              |                       | $4.30 \times 10^4$                      |          |
| {[Zn <sub>3</sub> (bpydb) <sub>2</sub> (atz) <sub>2</sub> (DMF)](DMF) <sub>6</sub> } <sub>n</sub>                                     | Fe <sup>3+</sup>                             |                       | $1.15 \times 10^4$                      | 4        |
| Tb-DSOA                                                                                                                               | Fe <sup>3+</sup>                             |                       | $3.54 \times 10^3$                      | 5        |
| [Cd <sub>3</sub> {Ir(ppy-COO) <sub>3</sub> } <sub>2</sub> (DMF) <sub>2</sub> (H <sub>2</sub> O) <sub>4</sub> ]·6H <sub>2</sub> O·2DMF | Fe <sup>3+</sup>                             |                       | $1.17 \times 10^4$                      | 6        |
|                                                                                                                                       | Cr <sub>2</sub> O <sub>7</sub> <sup>2-</sup> |                       | $3.48 \times 10^4$                      |          |
| {[Cd(BIPA)(IPA)]·DMF} <sub>n</sub>                                                                                                    | Hg <sup>2+</sup>                             | $5.0 \times 10^{-7}$  | $9.21 \times 10^3$                      | 7        |
| {[Cd(BIPA)(HIPA)]·DMF} <sub>n</sub>                                                                                                   |                                              | $2.5 \times 10^{-7}$  | $1.28 \times 10^4$                      |          |
| TMU-34(-2H) in water                                                                                                                  | Hg <sup>2+</sup>                             | $1.8 \times 10^{-6}$  | $3.73 \times 10^3$                      | 8        |
| [TbL <sub>1.5</sub> (H <sub>2</sub> O) <sub>2</sub> ]·H <sub>2</sub> O                                                                | Hg <sup>2+</sup>                             |                       | $7.46 \times 10^3$                      | 9        |
| [Zn(2-NH <sub>2</sub> bdc)(bibp)] <sub>n</sub>                                                                                        | Hg <sup>2+</sup>                             | $4.2 \times 10^{-8}$  | $4.55 \times 10^3$                      | 10       |
| UiO-66@Butyne                                                                                                                         | Hg <sup>2+</sup>                             | $1.1 \times 10^{-8}$  |                                         | 11       |
| [Eu <sub>2</sub> (tpbpc) <sub>4</sub> ·CO <sub>3</sub> ·H <sub>2</sub> O]·DMF·solvent                                                 | Cr <sub>2</sub> O <sub>7</sub> <sup>2-</sup> | $1.1 \times 10^{-6}$  | $1.0 \times 10^4$                       | 12       |
| {[Zn <sub>2</sub> (tpeb) <sub>2</sub> (2,3-ndc) <sub>2</sub> ]·H <sub>2</sub> O} <sub>n</sub>                                         | Cr <sub>2</sub> O <sub>7</sub> <sup>2-</sup> | 1.7 ppb               | $7.3 \times 10^4$                       | 13       |

## References

- (1) Bruker 2000, SMART (Version 5.0), SAINT-plus (Version 6), SHELXTL (Version 6.1), and SADABS (Version 2.03); Bruker AXS Inc.: Madison, WI.
- (2) G. M. Sheldrick, Crystal structure refinement with SHELXL, *Acta Cryst.*, 2015, **C71**, 3–8.
- (3) W. Yan, C. L. Zhang, S. G. Chen, L. J. Han, H. G. Zheng, *ACS Appl. Mater. Interfaces*, 2017, **9**, 1629–1634.
- (4) M.-Y. Sun, D.-M. Chen, *Polyhedron*, 2018, **147**, 80–85.
- (5) X.-Y. Dong, R. Wang, J.-Z. Wang, S.-Q. Zang, T. C. W. Mak, *J. Mater. Chem. A*, 2015, **3**, 641–647.
- (6) K. Fan, S.-S. Bao, W.-X. Nie, C.-H. Liao, L.-M. Zheng, *Inorg. Chem.*, 2018, **57**, 1079–1089.
- (7) Z. J. Wang, L. J. Han, X. J. Gao, H. G. Zheng, *Inorg. Chem.*, 2018, **57**, 5232–5239.
- (8) S. A. A. Razavi, M. Y. Masoomi, Ali. Morsali, *Inorg. Chem.*, 2017, **56**, 9646–9652.
- (9) H.-M. Wang, Y.-Y. Yang, C.-H. Zeng, T.-S. Chu, Y.-M. Zhu, S. W. Ng, *Photochem. Photobiol. Sci.*, 2013, **12**, 1700–1706.
- (10) L. Wen, X. Zheng, K. Lv, C. Wang, X. Xu, *Inorg. Chem.*, 2015, **54**, 7133–7135.
- (11) P. Samanta, A. V. Desai, S. Sharma, P. Chandra, S. K. Ghosh, *Inorg. Chem.*, 2018, **57**, 2360–2364.
- (12) J. Liu, G. Ji, J. Xiao, Z. Liu, *Inorg. Chem.*, 2017, **56**, 4197–4205.
- (13) T.-Y. Gu, M. Dai, D. J. Young, Z.-G. Ren, J.-P. Lang, *Inorg. Chem.*, 2017, **56**, 4668–4678.
